# Supplementary material for: Presurgical Screening Improves Risk Prediction for Delirium in Elective Surgery of Older Patients: The PAWEL RISK Study
Source: Frontiers journal article supplement (doi:10.3389/fnagi.2021.679933), 2021-07-27
Supplement: Data_Sheet_2.pdf [file Data_Sheet_2.pdf]

## Supplement S2: Table 1 ASA Physical Status Classification

<https://www.asahq.org/standards-and-guidelines/asa-physical-status-classification-system>

(Approved by the ASA House of Delegates on October 15, 2014): The ASA Physical Status Classification System alone does not predict the perioperative risks, but used with other factors (eg, type of surgery, frailty, level of deconditioning), it can be helpful in predicting perioperative risks. The definitions and examples of adult patients shown in the table below are guidelines for the clinician. Assigning a Physical Status classification level is a clinical decision based on multiple factors. While the Physical Status classification may initially be determined at various times during the preoperative assessment of the patient, the final assignment of Physical Status classification is made on the day of anesthesia care by the anesthesiologist after evaluating the patient. Current definitions and ASA-Approved examples for level ASA I to IV, which are relevant or elective surgery. ASA V is only for emergency surgery.

|                |                                                                          |                                                                                                                                                                                                                                                                                                                                                                         |
|----------------|--------------------------------------------------------------------------|-------------------------------------------------------------------------------------------------------------------------------------------------------------------------------------------------------------------------------------------------------------------------------------------------------------------------------------------------------------------------|
| <b>ASA I</b>   | A normal healthy patient                                                 | Healthy, non-smoking, no or minimal alcohol use                                                                                                                                                                                                                                                                                                                         |
| <b>ASA II</b>  | A patient with mild systemic disease                                     | Mild diseases only without substantive functional limitations. Current smoker, social alcohol drinker, pregnancy, obesity ( $30 < \text{BMI} < 40$ ), well-controlled DM/HTN, mild lung disease                                                                                                                                                                         |
| <b>ASA III</b> | A patient with severe systemic disease                                   | Substantive functional limitations; One or more moderate to severe diseases. Poorly controlled DM or HTN, COPD, morbid obesity ( $\text{BMI} \geq 40$ ), active hepatitis, alcohol dependence or abuse, implanted pacemaker, moderate reduction of ejection fraction, ESRD undergoing regularly scheduled dialysis, history (>3 months) of MI, CVA, TIA, or CAD/stents. |
| <b>ASA IV</b>  | A patient with severe systemic disease that is a constant threat to life | Recent (<3 months) MI, CVA, TIA or CAD/stents, ongoing cardiac ischemia or severe valve dysfunction, severe reduction of ejection fraction, shock, sepsis, DIC, ARD or ESRD not undergoing regularly scheduled dialysis                                                                                                                                                 |

ARD: acute respiratory distress, BMI: body mass index, CAD: coronary artery disease, COPD: chronic obstructive lung disease, CVA: cerebrovascular accident, DIC: disseminated intravascular coagulation, DM: diabetes mellitus, ESRD: end-stage renal disease, HTN: hypertension, MI: myocardial infarction, TIA transient ischemic attack

**Supplement 2, Table 2** Overview of the individual seven MoCA categories (Nasreddine et al. 2005) of patients without delirium ( $n = 672$ ) compared with data of patients with delirium ( $n = 208$ ). Median and distribution across categories are given. Test statistics comparing these groups for differences on all available data are stated as well (Mann-Whitney-U-tests were conducted as the data is not normally distributed).

| Variable                 | Study subjects without delirium (n = 672) |                    |                           |            |     | Study subjects with delirium (n = 208) |                    |                           |            |     | W     | $\chi^2$ | p       |
|--------------------------|-------------------------------------------|--------------------|---------------------------|------------|-----|----------------------------------------|--------------------|---------------------------|------------|-----|-------|----------|---------|
|                          | Median                                    | N (available data) | Percentage available data | Categories | N   | Median                                 | N (available data) | Percentage available data | Categories | N   |       |          |         |
| Visuospatial / Executive | 4                                         | 659                | 98.07%                    | 0 points   | 10  | 3                                      | 198                | 95.19%                    | 0 points   | 13  | 72135 |          | .020*   |
|                          |                                           |                    |                           | 1 point    | 35  |                                        |                    |                           | 1 point    | 19  |       |          |         |
|                          |                                           |                    |                           | 2 points   | 104 |                                        |                    |                           | 2 points   | 34  |       |          |         |
|                          |                                           |                    |                           | 3 points   | 173 |                                        |                    |                           | 3 points   | 45  |       |          |         |
|                          |                                           |                    |                           | 4 points   | 197 |                                        |                    |                           | 4 points   | 51  |       |          |         |
|                          |                                           |                    |                           | 5 points   | 133 |                                        |                    |                           | 5 points   | 36  |       |          |         |
| Naming                   | 3                                         | 666                | 99.12%                    | 0 points   | 2   | 3                                      | 205                | 98.56%                    | 0 points   | 2   | 70768 |          | .083    |
|                          |                                           |                    |                           | 1 point    | 1   |                                        |                    |                           | 1 point    | 5   |       |          |         |
|                          |                                           |                    |                           | 2 points   | 42  |                                        |                    |                           | 2 points   | 14  |       |          |         |
|                          |                                           |                    |                           | 3 points   | 621 |                                        |                    |                           | 3 points   | 184 |       |          |         |
| Attention                | 6                                         | 672                | 100%                      | 0 points   | 6   | 5                                      | 208                | 100%                      | 0 points   | 5   | 78136 |          | .005*   |
|                          |                                           |                    |                           | 1 point    | 5   |                                        |                    |                           | 1 point    | 4   |       |          |         |
|                          |                                           |                    |                           | 2 points   | 6   |                                        |                    |                           | 2 points   | 5   |       |          |         |
|                          |                                           |                    |                           | 3 points   | 26  |                                        |                    |                           | 3 points   | 15  |       |          |         |
|                          |                                           |                    |                           | 4 points   | 76  |                                        |                    |                           | 4 points   | 27  |       |          |         |
|                          |                                           |                    |                           | 5 points   | 312 |                                        |                    |                           | 5 points   | 63  |       |          |         |
| Language                 | 2                                         | 672                | 100%                      | 0 points   | 56  | 2                                      | 208                | 100%                      | 0 points   | 36  | 83623 |          | < .001* |
|                          |                                           |                    |                           | 1 point    | 174 |                                        |                    |                           | 1 point    | 63  |       |          |         |
|                          |                                           |                    |                           | 2 points   | 273 |                                        |                    |                           | 2 points   | 81  |       |          |         |
|                          |                                           |                    |                           | 3 points   | 169 |                                        |                    |                           | 3 points   | 28  |       |          |         |
| Abstraction              | 2                                         | 666                | 99.12%                    | 0 points   | 67  | 2                                      | 205                | 98.56%                    | 0 points   | 22  | 75931 |          | .005*   |
|                          |                                           |                    |                           | 1 point    | 170 |                                        |                    |                           | 1 point    | 76  |       |          |         |
|                          |                                           |                    |                           | 2 points   | 429 |                                        |                    |                           | 2 points   | 107 |       |          |         |
| Delayed Recall           | 3                                         | 666                | 99.12%                    | 0 points   | 129 | 1                                      | 205                | 98.56%                    | 0 points   | 73  | 86273 |          | < .001* |
|                          |                                           |                    |                           | 1 point    | 69  |                                        |                    |                           | 1 point    | 31  |       |          |         |
|                          |                                           |                    |                           | 2 points   | 129 |                                        |                    |                           | 2 points   | 36  |       |          |         |
|                          |                                           |                    |                           | 3 points   | 139 |                                        |                    |                           | 3 points   | 32  |       |          |         |
|                          |                                           |                    |                           | 4 points   | 113 |                                        |                    |                           | 4 points   | 22  |       |          |         |
|                          |                                           |                    |                           | 5 points   | 87  |                                        |                    |                           | 5 points   | 11  |       |          |         |
| Orientation              | 6                                         | 666                | 99.12%                    | 0 points   | 0   | 6                                      | 205                | 98.56%                    | 0 points   | 0   | 79454 |          | < .001* |
|                          |                                           |                    |                           | 1 point    | 0   |                                        |                    |                           | 1 point    | 0   |       |          |         |
|                          |                                           |                    |                           | 2 points   | 0   |                                        |                    |                           | 2 points   | 7   |       |          |         |
|                          |                                           |                    |                           | 3 points   | 1   |                                        |                    |                           | 3 points   | 6   |       |          |         |
|                          |                                           |                    |                           | 4 points   | 4   |                                        |                    |                           | 4 points   | 6   |       |          |         |
|                          |                                           |                    |                           | 5 points   | 42  |                                        |                    |                           | 5 points   | 28  |       |          |         |
|                          |                                           |                    |                           | 6 points   | 619 |                                        |                    |                           | 6 points   | 158 |       |          |         |
